# Supplementary material for: Genetic mechanisms underlying the associations between brain structure and mental health
Source: Research Square preprint supplement (doi:10.21203/rs.3.rs-7996571/v1), 2025-12-02
Supplement: Supplementary file 1 [file 1a5549ecc6f217fc9f0e3a26.xlsx]

## Sheet: Table S5
	Table S5. The 14 complex traits and diseases we have stduied in the Mendelian randomization analysis.
GWAS ID	Year	Trait	Consortium	Sample size	PMID	URL
ieu-b-5102	2022	Schizophrenia	PGC	127906	35396580	https://gwas.mrcieu.ac.uk/datasets/ieu-b-5102/
ieu-b-102	2019	Major depression	PGC	500199	30718901	https://gwas.mrcieu.ac.uk/datasets/ieu-b-102/
ieu-a-1183	2017	ADHD	PGC	55374	NA	https://gwas.mrcieu.ac.uk/datasets/ieu-a-1183/
ieu-a-802	2013	Autism	PGC	29415	23453885	https://gwas.mrcieu.ac.uk/datasets/ieu-a-802/
ebi-a-GCST90027158	2022	AD	NA	487511	35379992	https://gwas.mrcieu.ac.uk/datasets/ebi-a-GCST90027158/
ebi-a-GCST003770	2016	Neuroticism	NA	170911	27089181	https://gwas.mrcieu.ac.uk/datasets/ebi-a-GCST003770/
ieu-a-1000	2016	Depressive symptoms	SSGAC	161460	27089181	https://gwas.mrcieu.ac.uk/datasets/ieu-a-1000/
ebi-a-GCST006572	2018	Cognitive performance	NA	257841	30038396	https://gwas.mrcieu.ac.uk/datasets/ebi-a-GCST006572/
ebi-a-GCST006250	2018	Intelligence	NA	269867	29942086	https://gwas.mrcieu.ac.uk/datasets/ebi-a-GCST006250/
ieu-a-16	2014	Childhood intelligence	SSGAC	12441	23358156	https://gwas.mrcieu.ac.uk/datasets/ieu-a-16/
ieu-a-836	2013	College completion	SSGAC	95427	23722424	https://gwas.mrcieu.ac.uk/datasets/ieu-a-836/
ebi-a-GCST006686	2016	Sleep duration (undersleepers)	NA	110188	27494321	https://gwas.mrcieu.ac.uk/datasets/ebi-a-GCST006686/
ieu-b-4833	2022	Alcohol consumption	Within family GWAS consortium	29540	NA	https://gwas.mrcieu.ac.uk/datasets/ieu-b-4833/
ieu-b-4763	2021	C-reactive protein	Within family GWAS consortium	20623	NA	https://gwas.mrcieu.ac.uk/datasets/ieu-b-4763/
