# Supplementary material for: Genetic mechanisms underlying the associations between brain structure and mental health
Source: Research Square preprint supplement (doi:10.21203/rs.3.rs-7996571/v1), 2025-12-02
Supplement: Supplementary file 2 [file 4fa7e1c914759f7e214de91e.xlsx]

## Sheet: Table S1
Table S1. The UK biobank showcase variables of brain MRI traits used in this study.
Field ID	Description	Time
25888	Volume of grey matter in Amygdala (left)	Instance 2
25889	Volume of grey matter in Amygdala (right)	Instance 2
25822	Volume of grey matter in Angular Gyrus (left)	Instance 2
25823	Volume of grey matter in Angular Gyrus (right)	Instance 2
25892	Volume of grey matter in Brain-Stem	Instance 2
25880	Volume of grey matter in Caudate (left)	Instance 2
25881	Volume of grey matter in Caudate (right)	Instance 2
25864	Volume of grey matter in Central Opercular Cortex (left)	Instance 2
25865	Volume of grey matter in Central Opercular Cortex (right)	Instance 2
25838	Volume of grey matter in Cingulate Gyrus, anterior division (left)	Instance 2
25839	Volume of grey matter in Cingulate Gyrus, anterior division (right)	Instance 2
25840	Volume of grey matter in Cingulate Gyrus, posterior division (left)	Instance 2
25841	Volume of grey matter in Cingulate Gyrus, posterior division (right)	Instance 2
25900	Volume of grey matter in Crus I Cerebellum (left)	Instance 2
25902	Volume of grey matter in Crus I Cerebellum (right)	Instance 2
25901	Volume of grey matter in Crus I Cerebellum (vermis)	Instance 2
25903	Volume of grey matter in Crus II Cerebellum (left)	Instance 2
25905	Volume of grey matter in Crus II Cerebellum (right)	Instance 2
25904	Volume of grey matter in Crus II Cerebellum (vermis)	Instance 2
25844	Volume of grey matter in Cuneal Cortex (left)	Instance 2
25845	Volume of grey matter in Cuneal Cortex (right)	Instance 2
25830	Volume of grey matter in Frontal Medial Cortex (left)	Instance 2
25831	Volume of grey matter in Frontal Medial Cortex (right)	Instance 2
25862	Volume of grey matter in Frontal Operculum Cortex (left)	Instance 2
25863	Volume of grey matter in Frontal Operculum Cortex (right)	Instance 2
25846	Volume of grey matter in Frontal Orbital Cortex (left)	Instance 2
25847	Volume of grey matter in Frontal Orbital Cortex (right)	Instance 2
25782	Volume of grey matter in Frontal Pole (left)	Instance 2
25783	Volume of grey matter in Frontal Pole (right)	Instance 2
25870	Volume of grey matter in Heschl's Gyrus (includes H1 and H2) (left)	Instance 2
25871	Volume of grey matter in Heschl's Gyrus (includes H1 and H2) (right)	Instance 2
25886	Volume of grey matter in Hippocampus (left)	Instance 2
25887	Volume of grey matter in Hippocampus (right)	Instance 2
25893	Volume of grey matter in I-IV Cerebellum (left)	Instance 2
25894	Volume of grey matter in I-IV Cerebellum (right)	Instance 2
25915	Volume of grey matter in IX Cerebellum (left)	Instance 2
25917	Volume of grey matter in IX Cerebellum (right)	Instance 2
25916	Volume of grey matter in IX Cerebellum (vermis)	Instance 2
25792	Volume of grey matter in Inferior Frontal Gyrus, pars opercularis (left)	Instance 2
25793	Volume of grey matter in Inferior Frontal Gyrus, pars opercularis (right)	Instance 2
25790	Volume of grey matter in Inferior Frontal Gyrus, pars triangularis (left)	Instance 2
25791	Volume of grey matter in Inferior Frontal Gyrus, pars triangularis (right)	Instance 2
25808	Volume of grey matter in Inferior Temporal Gyrus, anterior division (left)	Instance 2
25809	Volume of grey matter in Inferior Temporal Gyrus, anterior division (right)	Instance 2
25810	Volume of grey matter in Inferior Temporal Gyrus, posterior division (left)	Instance 2
25811	Volume of grey matter in Inferior Temporal Gyrus, posterior division (right)	Instance 2
25812	Volume of grey matter in Inferior Temporal Gyrus, temporooccipital part (left)	Instance 2
25813	Volume of grey matter in Inferior Temporal Gyrus, temporooccipital part (right)	Instance 2
25784	Volume of grey matter in Insular Cortex (left)	Instance 2
25785	Volume of grey matter in Insular Cortex (right)	Instance 2
25828	Volume of grey matter in Intracalcarine Cortex (left)	Instance 2
25829	Volume of grey matter in Intracalcarine Cortex (right)	Instance 2
25832	Volume of grey matter in Juxtapositional Lobule Cortex (formerly Supplementary Motor Cortex) (left)	Instance 2
25833	Volume of grey matter in Juxtapositional Lobule Cortex (formerly Supplementary Motor Cortex) (right)	Instance 2
25826	Volume of grey matter in Lateral Occipital Cortex, inferior division (left)	Instance 2
25827	Volume of grey matter in Lateral Occipital Cortex, inferior division (right)	Instance 2
25824	Volume of grey matter in Lateral Occipital Cortex, superior division (left)	Instance 2
25825	Volume of grey matter in Lateral Occipital Cortex, superior division (right)	Instance 2
25852	Volume of grey matter in Lingual Gyrus (left)	Instance 2
25853	Volume of grey matter in Lingual Gyrus (right)	Instance 2
25788	Volume of grey matter in Middle Frontal Gyrus (left)	Instance 2
25789	Volume of grey matter in Middle Frontal Gyrus (right)	Instance 2
25802	Volume of grey matter in Middle Temporal Gyrus, anterior division (left)	Instance 2
25803	Volume of grey matter in Middle Temporal Gyrus, anterior division (right)	Instance 2
25804	Volume of grey matter in Middle Temporal Gyrus, posterior division (left)	Instance 2
25805	Volume of grey matter in Middle Temporal Gyrus, posterior division (right)	Instance 2
25806	Volume of grey matter in Middle Temporal Gyrus, temporooccipital part (left)	Instance 2
25807	Volume of grey matter in Middle Temporal Gyrus, temporooccipital part (right)	Instance 2
25860	Volume of grey matter in Occipital Fusiform Gyrus (left)	Instance 2
25861	Volume of grey matter in Occipital Fusiform Gyrus (right)	Instance 2
25876	Volume of grey matter in Occipital Pole (left)	Instance 2
25877	Volume of grey matter in Occipital Pole (right)	Instance 2
25884	Volume of grey matter in Pallidum (left)	Instance 2
25885	Volume of grey matter in Pallidum (right)	Instance 2
25836	Volume of grey matter in Paracingulate Gyrus (left)	Instance 2
25837	Volume of grey matter in Paracingulate Gyrus (right)	Instance 2
25848	Volume of grey matter in Parahippocampal Gyrus, anterior division (left)	Instance 2
25849	Volume of grey matter in Parahippocampal Gyrus, anterior division (right)	Instance 2
25850	Volume of grey matter in Parahippocampal Gyrus, posterior division (left)	Instance 2
25851	Volume of grey matter in Parahippocampal Gyrus, posterior division (right)	Instance 2
25866	Volume of grey matter in Parietal Operculum Cortex (left)	Instance 2
25867	Volume of grey matter in Parietal Operculum Cortex (right)	Instance 2
25868	Volume of grey matter in Planum Polare (left)	Instance 2
25869	Volume of grey matter in Planum Polare (right)	Instance 2
25872	Volume of grey matter in Planum Temporale (left)	Instance 2
25873	Volume of grey matter in Planum Temporale (right)	Instance 2
25814	Volume of grey matter in Postcentral Gyrus (left)	Instance 2
25815	Volume of grey matter in Postcentral Gyrus (right)	Instance 2
25794	Volume of grey matter in Precentral Gyrus (left)	Instance 2
25795	Volume of grey matter in Precentral Gyrus (right)	Instance 2
25842	Volume of grey matter in Precuneous Cortex (left)	Instance 2
25843	Volume of grey matter in Precuneous Cortex (right)	Instance 2
25882	Volume of grey matter in Putamen (left)	Instance 2
25883	Volume of grey matter in Putamen (right)	Instance 2
25834	Volume of grey matter in Subcallosal Cortex (left)	Instance 2
25835	Volume of grey matter in Subcallosal Cortex (right)	Instance 2
25786	Volume of grey matter in Superior Frontal Gyrus (left)	Instance 2
25787	Volume of grey matter in Superior Frontal Gyrus (right)	Instance 2
25816	Volume of grey matter in Superior Parietal Lobule (left)	Instance 2
25817	Volume of grey matter in Superior Parietal Lobule (right)	Instance 2
25798	Volume of grey matter in Superior Temporal Gyrus, anterior division (left)	Instance 2
25799	Volume of grey matter in Superior Temporal Gyrus, anterior division (right)	Instance 2
25800	Volume of grey matter in Superior Temporal Gyrus, posterior division (left)	Instance 2
25801	Volume of grey matter in Superior Temporal Gyrus, posterior division (right)	Instance 2
25874	Volume of grey matter in Supracalcarine Cortex (left)	Instance 2
25875	Volume of grey matter in Supracalcarine Cortex (right)	Instance 2
25818	Volume of grey matter in Supramarginal Gyrus, anterior division (left)	Instance 2
25819	Volume of grey matter in Supramarginal Gyrus, anterior division (right)	Instance 2
25820	Volume of grey matter in Supramarginal Gyrus, posterior division (left)	Instance 2
25821	Volume of grey matter in Supramarginal Gyrus, posterior division (right)	Instance 2
25854	Volume of grey matter in Temporal Fusiform Cortex, anterior division (left)	Instance 2
25855	Volume of grey matter in Temporal Fusiform Cortex, anterior division (right)	Instance 2
25856	Volume of grey matter in Temporal Fusiform Cortex, posterior division (left)	Instance 2
25857	Volume of grey matter in Temporal Fusiform Cortex, posterior division (right)	Instance 2
25858	Volume of grey matter in Temporal Occipital Fusiform Cortex (left)	Instance 2
25859	Volume of grey matter in Temporal Occipital Fusiform Cortex (right)	Instance 2
25796	Volume of grey matter in Temporal Pole (left)	Instance 2
25797	Volume of grey matter in Temporal Pole (right)	Instance 2
25878	Volume of grey matter in Thalamus (left)	Instance 2
25879	Volume of grey matter in Thalamus (right)	Instance 2
25895	Volume of grey matter in V Cerebellum (left)	Instance 2
25896	Volume of grey matter in V Cerebellum (right)	Instance 2
25897	Volume of grey matter in VI Cerebellum (left)	Instance 2
25899	Volume of grey matter in VI Cerebellum (right)	Instance 2
25898	Volume of grey matter in VI Cerebellum (vermis)	Instance 2
25909	Volume of grey matter in VIIIa Cerebellum (left)	Instance 2
25911	Volume of grey matter in VIIIa Cerebellum (right)	Instance 2
25910	Volume of grey matter in VIIIa Cerebellum (vermis)	Instance 2
25912	Volume of grey matter in VIIIb Cerebellum (left)	Instance 2
25914	Volume of grey matter in VIIIb Cerebellum (right)	Instance 2
25913	Volume of grey matter in VIIIb Cerebellum (vermis)	Instance 2
25906	Volume of grey matter in VIIb Cerebellum (left)	Instance 2
25908	Volume of grey matter in VIIb Cerebellum (right)	Instance 2
25907	Volume of grey matter in VIIb Cerebellum (vermis)	Instance 2
25890	Volume of grey matter in Ventral Striatum (left)	Instance 2
25891	Volume of grey matter in Ventral Striatum (right)	Instance 2
25918	Volume of grey matter in X Cerebellum (left)	Instance 2
25919	Volume of grey matter in X Cerebellum (vermis)	Instance 2
25920	Volume of grey matter in X Cerebellum (right)	Instance 2
25023	Volume of accumbens (left)	Instance 2
25024	Volume of accumbens (right)	Instance 2
25021	Volume of amygdala (left)	Instance 2
25022	Volume of amygdala (right)	Instance 2
25013	Volume of caudate (left)	Instance 2
25014	Volume of caudate (right)	Instance 2
25019	Volume of hippocampus (left)	Instance 2
25020	Volume of hippocampus (right)	Instance 2
25017	Volume of pallidum (left)	Instance 2
25018	Volume of pallidum (right)	Instance 2
25015	Volume of putamen (left)	Instance 2
25016	Volume of putamen (right)	Instance 2
25011	Volume of thalamus (left)	Instance 2
25012	Volume of thalamus (right)	Instance 2
27143	Area of caudalanteriorcingulate (left hemisphere)	Instance 2
27236	Area of caudalanteriorcingulate (right hemisphere)	Instance 2
27144	Area of caudalmiddlefrontal (left hemisphere)	Instance 2
27237	Area of caudalmiddlefrontal (right hemisphere)	Instance 2
27145	Area of cuneus (left hemisphere)	Instance 2
27238	Area of cuneus (right hemisphere)	Instance 2
27146	Area of entorhinal (left hemisphere)	Instance 2
27239	Area of entorhinal (right hemisphere)	Instance 2
27147	Area of fusiform (left hemisphere)	Instance 2
27240	Area of fusiform (right hemisphere)	Instance 2
27148	Area of inferiorparietal (left hemisphere)	Instance 2
27241	Area of inferiorparietal (right hemisphere)	Instance 2
27149	Area of inferiortemporal (left hemisphere)	Instance 2
27242	Area of inferiortemporal (right hemisphere)	Instance 2
27173	Area of insula (left hemisphere)	Instance 2
27266	Area of insula (right hemisphere)	Instance 2
27150	Area of isthmuscingulate (left hemisphere)	Instance 2
27243	Area of isthmuscingulate (right hemisphere)	Instance 2
27151	Area of lateraloccipital (left hemisphere)	Instance 2
27244	Area of lateraloccipital (right hemisphere)	Instance 2
27152	Area of lateralorbitofrontal (left hemisphere)	Instance 2
27245	Area of lateralorbitofrontal (right hemisphere)	Instance 2
27153	Area of lingual (left hemisphere)	Instance 2
27246	Area of lingual (right hemisphere)	Instance 2
27154	Area of medialorbitofrontal (left hemisphere)	Instance 2
27247	Area of medialorbitofrontal (right hemisphere)	Instance 2
27155	Area of middletemporal (left hemisphere)	Instance 2
27248	Area of middletemporal (right hemisphere)	Instance 2
27157	Area of paracentral (left hemisphere)	Instance 2
27250	Area of paracentral (right hemisphere)	Instance 2
27156	Area of parahippocampal (left hemisphere)	Instance 2
27249	Area of parahippocampal (right hemisphere)	Instance 2
27158	Area of parsopercularis (left hemisphere)	Instance 2
27251	Area of parsopercularis (right hemisphere)	Instance 2
27159	Area of parsorbitalis (left hemisphere)	Instance 2
27252	Area of parsorbitalis (right hemisphere)	Instance 2
27160	Area of parstriangularis (left hemisphere)	Instance 2
27253	Area of parstriangularis (right hemisphere)	Instance 2
27161	Area of pericalcarine (left hemisphere)	Instance 2
27254	Area of pericalcarine (right hemisphere)	Instance 2
27162	Area of postcentral (left hemisphere)	Instance 2
27255	Area of postcentral (right hemisphere)	Instance 2
27163	Area of posteriorcingulate (left hemisphere)	Instance 2
27256	Area of posteriorcingulate (right hemisphere)	Instance 2
27164	Area of precentral (left hemisphere)	Instance 2
27257	Area of precentral (right hemisphere)	Instance 2
27165	Area of precuneus (left hemisphere)	Instance 2
27258	Area of precuneus (right hemisphere)	Instance 2
27166	Area of rostralanteriorcingulate (left hemisphere)	Instance 2
27259	Area of rostralanteriorcingulate (right hemisphere)	Instance 2
27167	Area of rostralmiddlefrontal (left hemisphere)	Instance 2
27260	Area of rostralmiddlefrontal (right hemisphere)	Instance 2
27168	Area of superiorfrontal (left hemisphere)	Instance 2
27261	Area of superiorfrontal (right hemisphere)	Instance 2
27169	Area of superiorparietal (left hemisphere)	Instance 2
27262	Area of superiorparietal (right hemisphere)	Instance 2
27170	Area of superiortemporal (left hemisphere)	Instance 2
27263	Area of superiortemporal (right hemisphere)	Instance 2
27171	Area of supramarginal (left hemisphere)	Instance 2
27264	Area of supramarginal (right hemisphere)	Instance 2
27172	Area of transversetemporal (left hemisphere)	Instance 2
27265	Area of transversetemporal (right hemisphere)	Instance 2
27174	Mean thickness of caudalanteriorcingulate (left hemisphere)	Instance 2
27267	Mean thickness of caudalanteriorcingulate (right hemisphere)	Instance 2
27175	Mean thickness of caudalmiddlefrontal (left hemisphere)	Instance 2
27268	Mean thickness of caudalmiddlefrontal (right hemisphere)	Instance 2
27176	Mean thickness of cuneus (left hemisphere)	Instance 2
27269	Mean thickness of cuneus (right hemisphere)	Instance 2
27177	Mean thickness of entorhinal (left hemisphere)	Instance 2
27270	Mean thickness of entorhinal (right hemisphere)	Instance 2
27178	Mean thickness of fusiform (left hemisphere)	Instance 2
27271	Mean thickness of fusiform (right hemisphere)	Instance 2
27179	Mean thickness of inferiorparietal (left hemisphere)	Instance 2
27272	Mean thickness of inferiorparietal (right hemisphere)	Instance 2
27180	Mean thickness of inferiortemporal (left hemisphere)	Instance 2
27273	Mean thickness of inferiortemporal (right hemisphere)	Instance 2
27204	Mean thickness of insula (left hemisphere)	Instance 2
27297	Mean thickness of insula (right hemisphere)	Instance 2
27181	Mean thickness of isthmuscingulate (left hemisphere)	Instance 2
27274	Mean thickness of isthmuscingulate (right hemisphere)	Instance 2
27182	Mean thickness of lateraloccipital (left hemisphere)	Instance 2
27275	Mean thickness of lateraloccipital (right hemisphere)	Instance 2
27183	Mean thickness of lateralorbitofrontal (left hemisphere)	Instance 2
27276	Mean thickness of lateralorbitofrontal (right hemisphere)	Instance 2
27184	Mean thickness of lingual (left hemisphere)	Instance 2
27277	Mean thickness of lingual (right hemisphere)	Instance 2
27185	Mean thickness of medialorbitofrontal (left hemisphere)	Instance 2
27278	Mean thickness of medialorbitofrontal (right hemisphere)	Instance 2
27186	Mean thickness of middletemporal (left hemisphere)	Instance 2
27279	Mean thickness of middletemporal (right hemisphere)	Instance 2
27188	Mean thickness of paracentral (left hemisphere)	Instance 2
27281	Mean thickness of paracentral (right hemisphere)	Instance 2
27187	Mean thickness of parahippocampal (left hemisphere)	Instance 2
27280	Mean thickness of parahippocampal (right hemisphere)	Instance 2
27189	Mean thickness of parsopercularis (left hemisphere)	Instance 2
27282	Mean thickness of parsopercularis (right hemisphere)	Instance 2
27190	Mean thickness of parsorbitalis (left hemisphere)	Instance 2
27283	Mean thickness of parsorbitalis (right hemisphere)	Instance 2
27191	Mean thickness of parstriangularis (left hemisphere)	Instance 2
27284	Mean thickness of parstriangularis (right hemisphere)	Instance 2
27192	Mean thickness of pericalcarine (left hemisphere)	Instance 2
27285	Mean thickness of pericalcarine (right hemisphere)	Instance 2
27193	Mean thickness of postcentral (left hemisphere)	Instance 2
27286	Mean thickness of postcentral (right hemisphere)	Instance 2
27194	Mean thickness of posteriorcingulate (left hemisphere)	Instance 2
27287	Mean thickness of posteriorcingulate (right hemisphere)	Instance 2
27195	Mean thickness of precentral (left hemisphere)	Instance 2
27288	Mean thickness of precentral (right hemisphere)	Instance 2
27196	Mean thickness of precuneus (left hemisphere)	Instance 2
27289	Mean thickness of precuneus (right hemisphere)	Instance 2
27197	Mean thickness of rostralanteriorcingulate (left hemisphere)	Instance 2
27290	Mean thickness of rostralanteriorcingulate (right hemisphere)	Instance 2
27198	Mean thickness of rostralmiddlefrontal (left hemisphere)	Instance 2
27291	Mean thickness of rostralmiddlefrontal (right hemisphere)	Instance 2
27199	Mean thickness of superiorfrontal (left hemisphere)	Instance 2
27292	Mean thickness of superiorfrontal (right hemisphere)	Instance 2
27200	Mean thickness of superiorparietal (left hemisphere)	Instance 2
27293	Mean thickness of superiorparietal (right hemisphere)	Instance 2
27201	Mean thickness of superiortemporal (left hemisphere)	Instance 2
27294	Mean thickness of superiortemporal (right hemisphere)	Instance 2
27202	Mean thickness of supramarginal (left hemisphere)	Instance 2
27295	Mean thickness of supramarginal (right hemisphere)	Instance 2
27203	Mean thickness of transversetemporal (left hemisphere)	Instance 2
27296	Mean thickness of transversetemporal (right hemisphere)	Instance 2
