# Supplementary material for: Genetic mechanisms underlying the associations between brain structure and mental health
Source: Research Square preprint supplement (doi:10.21203/rs.3.rs-7996571/v1), 2025-12-02
Supplement: Supplementary file 3 [file 9bf49db4d020620ca655ddbf.docx]

**Supplementary figures**

**Supplementary figure 1**


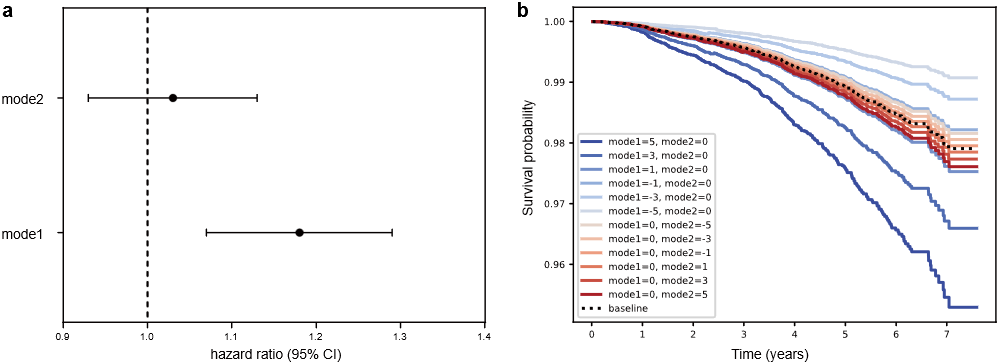


**The survival analysis results of the two brain structural modes. a.** Hazard ratio results of survival analysis.The widths of the lines extending from the center points represent 95% CI. **b.** Survival curves for the two brain structural modes. Keeping one brain mode unchanged, we divided the subjects into 6 groups based on the other brain mode scores (-5, -3, -1, 1, 3, and 5), and observed how the survival varies for the 6 group subjects compared to their baseline function. All these models were adjusted for age and sex.

**Supplementary figure 2**


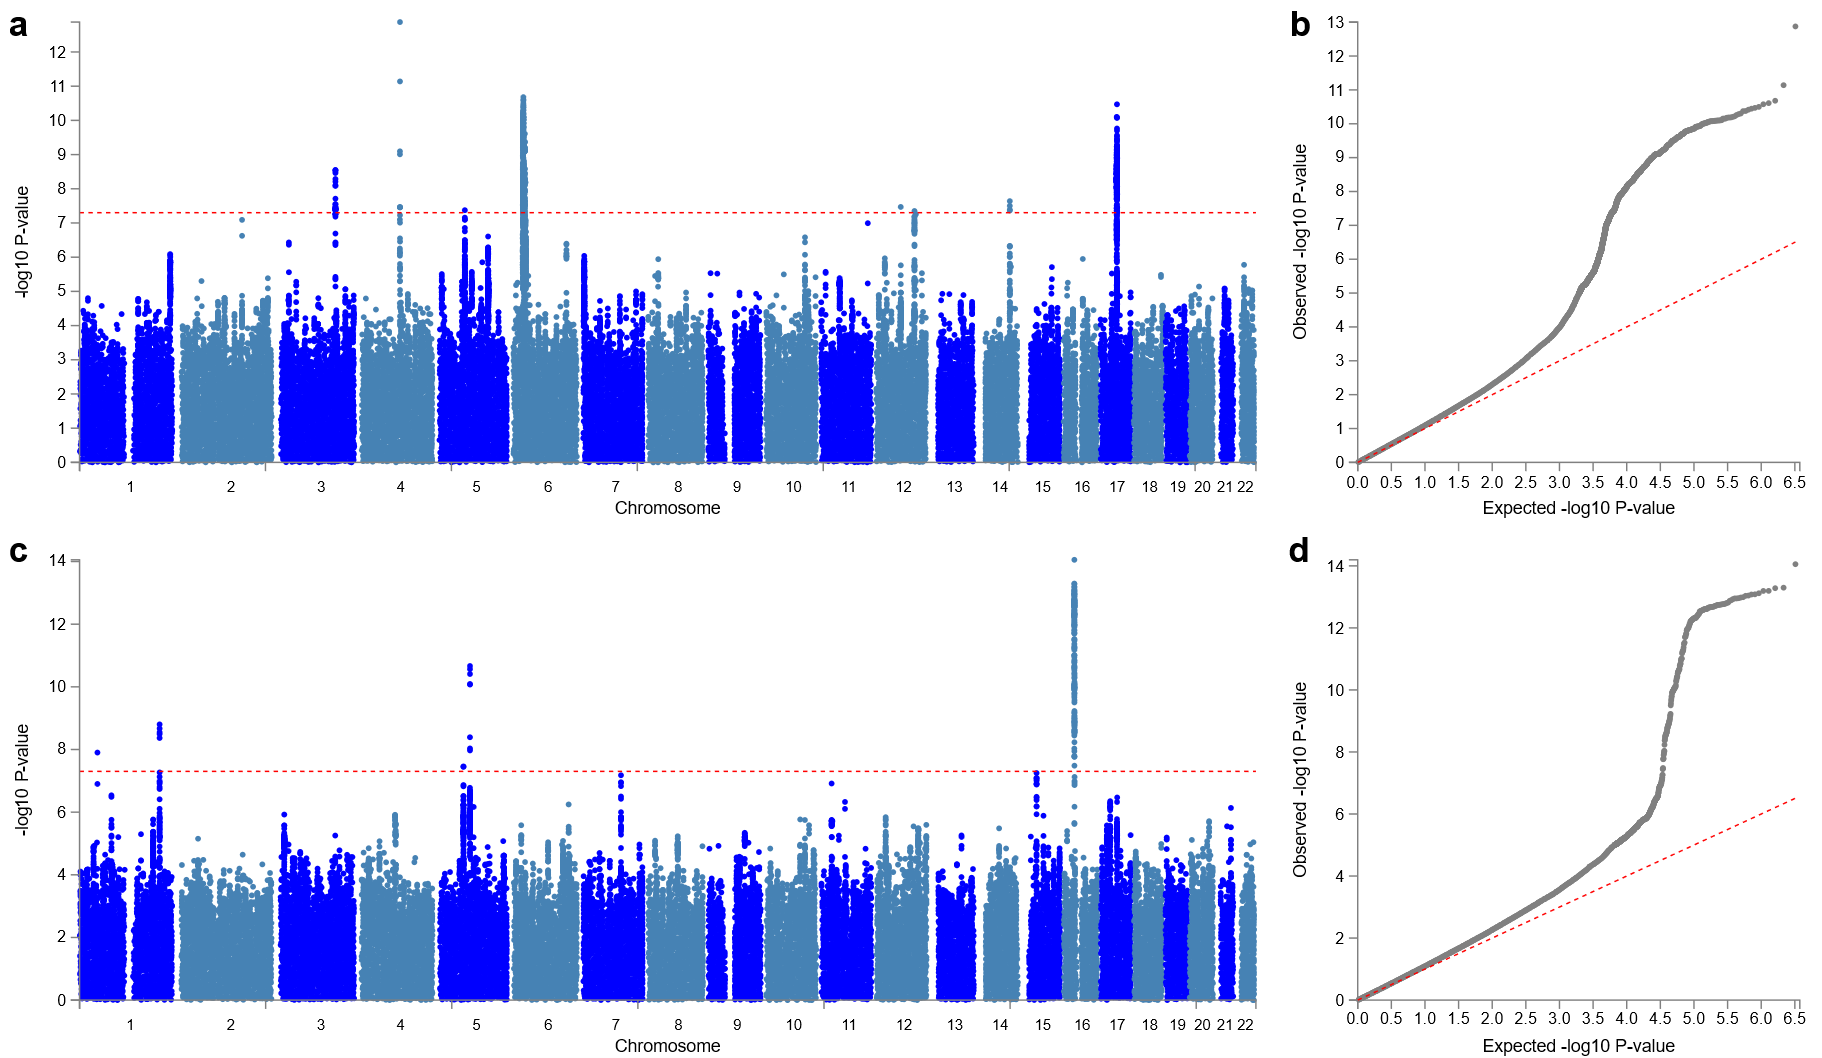


**Manhattan and quantile-quantile plots** **from the GWAS analyses of the two brain structural modes. a, c.** Manhattan plots from the GWAS analyses of brain mode 1 (**a**) and brain mode 2 (**c**). The horizontal red line represents the threshold for genome-wide significance (). **b, d.** Quantile-quantile plots from the GWAS analyses of brain mode 1 (**b**) and brain mode 2 (**d**).

**Supplementary figure 3**

**

**

**Manhattan plots from the GWAS analyses of the two mental health modes and their primary MHQ subcategories. a, b.** Manhattan plots from the GWAS analyses of mental health mode 1 (**a**) and trauma (**b**). **c, d.** Manhattan plots from the GWAS analyses of mental health mode 2 (**c**) and mental distress (**d**). The horizontal red line represents the threshold for genome-wide significance ().

**Supplementary figure 4**


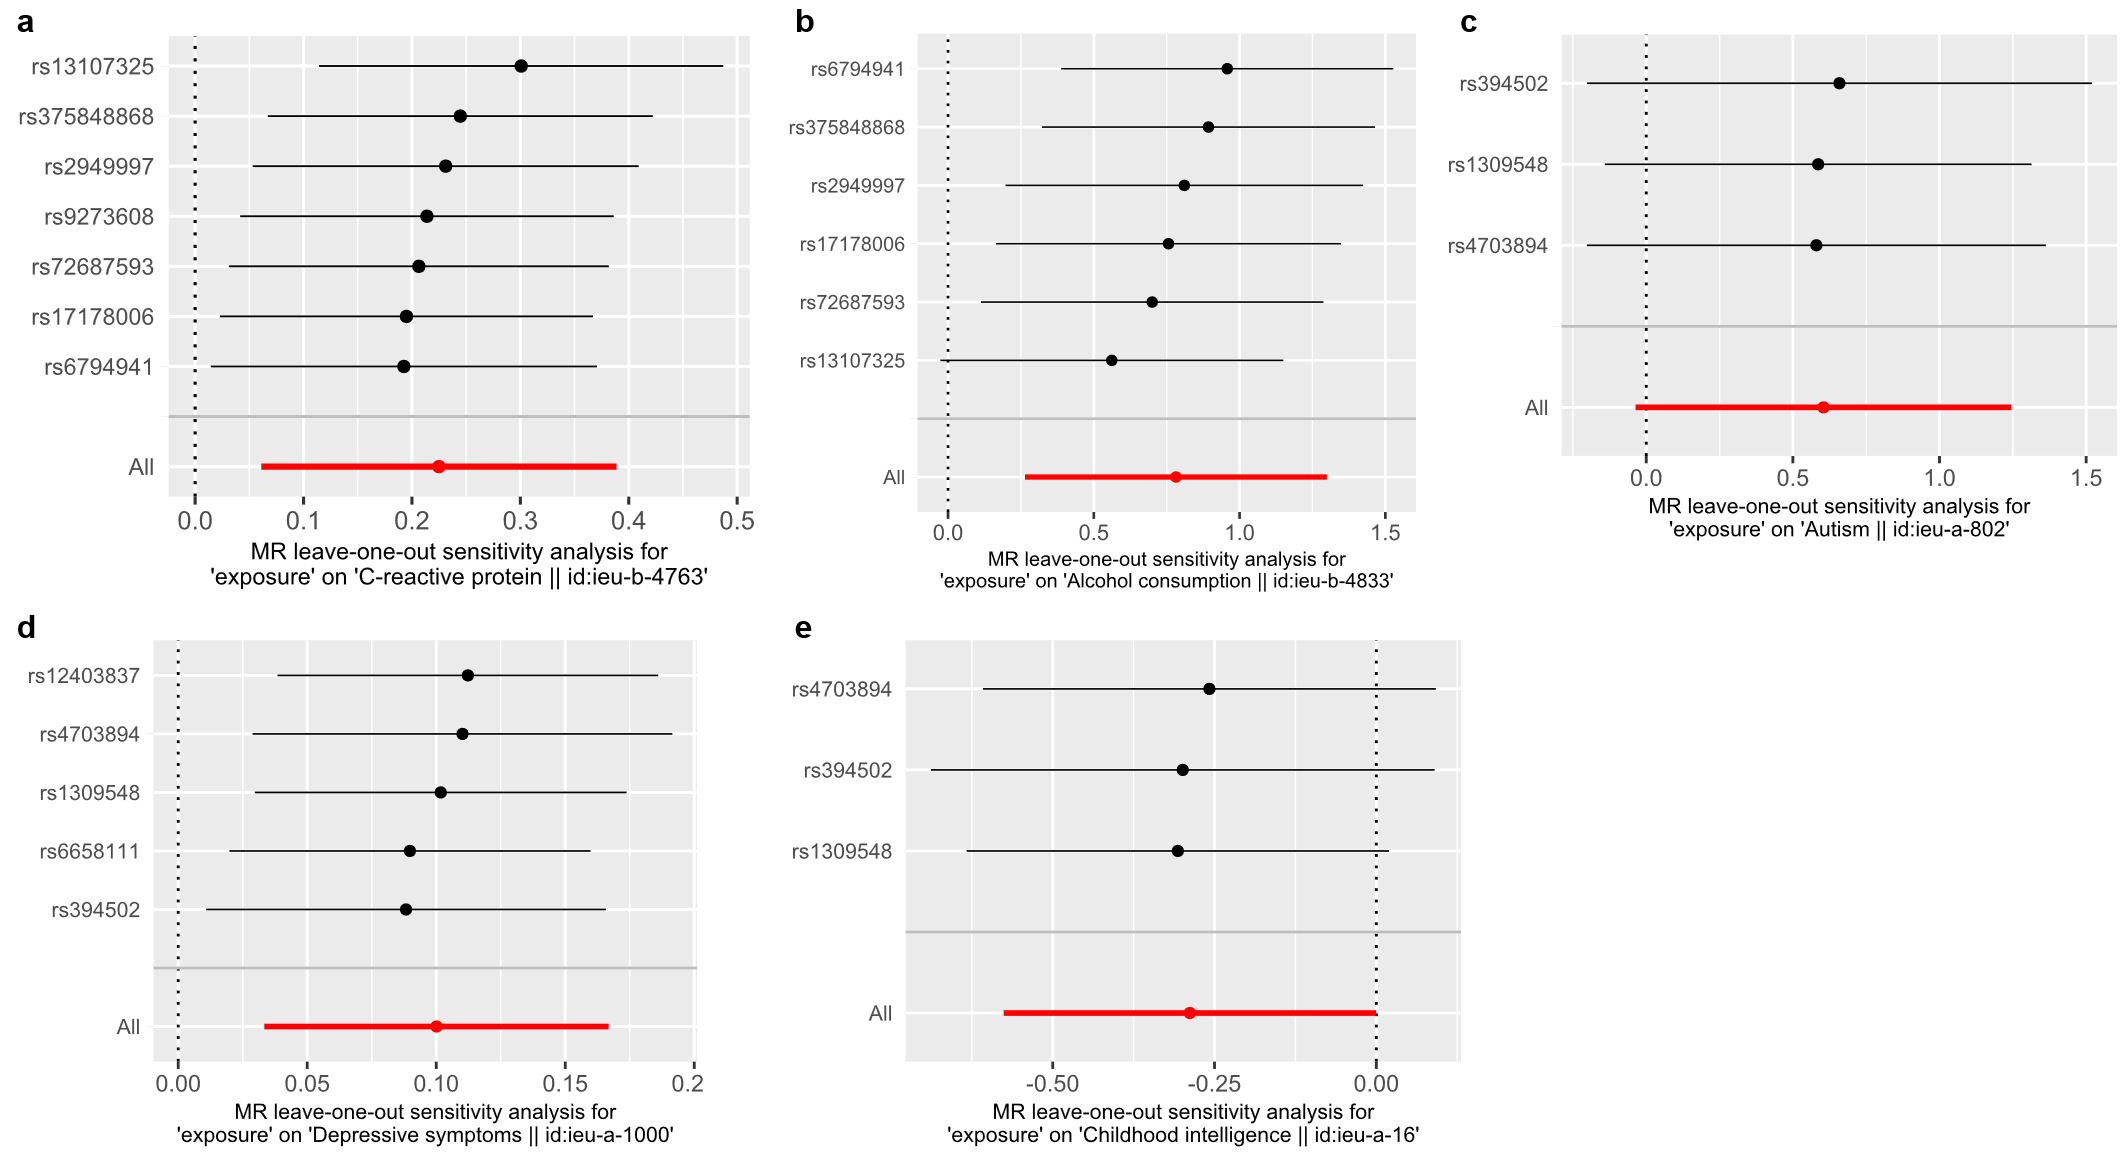


**Leave-one-out sensitivity analysis of genetic causal effects. a, b.** Leave-one-out tests of genetic causal effects from brain mode 1 to C-reactive protein (**a**) and alcohol consumption (**b**). **c, d, e.** Leave-one-out tests of genetic causal effects from brain mode 2 to ASD (**c**), depressive symptoms (**d**), and childhood intelligence (**e**).
