# Supplementary material for: Genetic mechanisms underlying the associations between brain structure and mental health
Source: Research Square preprint supplement (doi:10.21203/rs.3.rs-7996571/v1), 2025-12-02
Supplement: Supplementary file 4 [file adfa1698a10e746c4842ec6f.xlsx]

## Sheet: Table S3
Table S3. The UK biobank showcase variables of cognitive function tests used in this study.
Field ID	Description	Time	Category
20016	Fluid intelligence score	Instance 2	Fluid intelligence / reasoning
6373	Number of puzzles correctly solved	Instance 2	Matrix pattern completion
4282	Maximum digits remembered correctly	Instance 2	Numeric memory
399	Number of incorrect matches in round	Instance 2	Pairs matching
20018	Prospective memory result	Instance 2	Prospective memory
20023	Mean time to correctly identify matches	Instance 2	Reaction time
23324	Number of symbol digit matches made correctly	Instance 2	Symbol digit substitution
21004	Number of puzzles correct	Instance 2	Tower rearranging
6350	Duration to complete alphanumeric path (trail #2)	Instance 2	Trail making
