# Supplementary material for: Genetic mechanisms underlying the associations between brain structure and mental health
Source: Research Square preprint supplement (doi:10.21203/rs.3.rs-7996571/v1), 2025-12-02
Supplement: Supplementary file 5 [file d2b602b00886cab2c13c99f4.xlsx]

## Sheet: Table S2
Table S2. The UK biobank showcase variables of mental health symptoms used in this study.
Field ID	Description	Time	Category
20489	Felt loved as a child	Online follow-up	Traumatic events
20488	Physically abused by family as a child	Online follow-up	Traumatic events
20487	Felt hated by family member as a child	Online follow-up	Traumatic events
20490	Sexually molested as a child	Online follow-up	Traumatic events
20491	Someone to take to doctor when needed as a child	Online follow-up	Traumatic events
20522	Been in a confiding relationship as an adult	Online follow-up	Traumatic events
20523	Physical violence by partner or ex-partner as an adult	Online follow-up	Traumatic events
20521	Belittlement by partner or ex-partner as an adult	Online follow-up	Traumatic events
20524	Sexual interference by partner or ex-partner without consent as an adult	Online follow-up	Traumatic events
20525	Able to pay rent/mortgage as an adult	Online follow-up	Traumatic events
20531	Victim of sexual assault	Online follow-up	Traumatic events
20529	Victim of physically violent crime	Online follow-up	Traumatic events
20526	Been in serious accident believed to be life-threatening	Online follow-up	Traumatic events
20530	Witnessed sudden violent death	Online follow-up	Traumatic events
20528	Diagnosed with life-threatening illness	Online follow-up	Traumatic events
20527	Been involved in combat or exposed to war-zone	Online follow-up	Traumatic events
20497	Repeated disturbing thoughts of stressful experience in past month	Online follow-up	Traumatic events
20498	Felt very upset when reminded of stressful experience in past month	Online follow-up	Traumatic events
20495	Avoided activities or situations because of previous stressful experience in past month	Online follow-up	Traumatic events
20496	Felt distant from other people in past month	Online follow-up	Traumatic events
20494	Felt irritable or had angry outbursts in past month	Online follow-up	Traumatic events
20499	Ever sought or received professional help for mental distress	Online follow-up	Mental distress
20500	Ever suffered mental distress preventing usual activities	Online follow-up	Mental distress
20544	Mental health problems ever diagnosed by a professional	Online follow-up	Mental distress
20446	Ever had prolonged feelings of sadness or depression	Online follow-up	Depression
20441	Ever had prolonged loss of interest in normal activities	Online follow-up	Depression
20532	Did your sleep change?	Online follow-up	Depression
20435	Difficulty concentrating during worst depression	Online follow-up	Depression
20438	Duration of worst depression	Online follow-up	Depression
20449	Feelings of tiredness during worst episode of depression	Online follow-up	Depression
20450	Feelings of worthlessness during worst period of depression	Online follow-up	Depression
20436	Fraction of day affected during worst episode of depression	Online follow-up	Depression
20439	Frequency of depressed days during worst episode of depression	Online follow-up	Depression
20440	Impact on normal roles during worst period of depression	Online follow-up	Depression
20518	Recent changes in speed/amount of moving or speaking	Online follow-up	Depression
20510	Recent feelings of depression	Online follow-up	Depression
20507	Recent feelings of inadequacy	Online follow-up	Depression
20519	Recent feelings of tiredness or low energy	Online follow-up	Depression
20514	Recent lack of interest or pleasure in doing things	Online follow-up	Depression
20511	Recent poor appetite or overeating	Online follow-up	Depression
20513	Recent thoughts of suicide or self-harm	Online follow-up	Depression
20508	Recent trouble concentrating on things	Online follow-up	Depression
20437	Thoughts of death during worst depression	Online follow-up	Depression
20517	Trouble falling or staying asleep, or sleeping too much	Online follow-up	Depression
20536	Weight change during worst episode of depression	Online follow-up	Depression
20479	Ever thought that life not worth living	Online follow-up	Self-harm behaviours
20485	Ever contemplated self-harm	Online follow-up	Self-harm behaviours
20480	Ever self-harmed	Online follow-up	Self-harm behaviours
20482	Number of times self-harmed	Online follow-up	Self-harm behaviours
20553	Methods of self-harm used	Online follow-up	Self-harm behaviours
20483	Ever attempted suicide	Online follow-up	Self-harm behaviours
20505	Recent easy annoyance or irritability	Online follow-up	Anxiety
20512	Recent feelings of foreboding	Online follow-up	Anxiety
20506	Recent feelings or nervousness or anxiety	Online follow-up	Anxiety
20509	Recent inability to stop or control worrying	Online follow-up	Anxiety
20516	Recent restlessness	Online follow-up	Anxiety
20515	Recent trouble relaxing	Online follow-up	Anxiety
20520	Recent worrying too much about different things	Online follow-up	Anxiety
20502	Ever had period extreme irritability	Online follow-up	Mania
20501	Ever had period of mania / excitability	Online follow-up	Mania
20492	Longest period of mania or irritability	Online follow-up	Mania
20548	Manifestations of mania or irritability	Online follow-up	Mania
20493	Severity of problems due to mania or irritability	Online follow-up	Mania
20462	Distress caused by unusual or psychotic experiences	Online follow-up	Unusual and psychotic experiences
20468	Ever believed in an un-real conspiracy against self	Online follow-up	Unusual and psychotic experiences
20474	Ever believed in un-real communications or signs	Online follow-up	Unusual and psychotic experiences
20463	Ever heard an un-real voice	Online follow-up	Unusual and psychotic experiences
20471	Ever seen an un-real vision	Online follow-up	Unusual and psychotic experiences
20467	Frequency of unusual or psychotic experiences in past year	Online follow-up	Unusual and psychotic experiences
