# Supplementary material for: Genetic mechanisms underlying the associations between brain structure and mental health
Source: Research Square preprint supplement (doi:10.21203/rs.3.rs-7996571/v1), 2025-12-02
Supplement: Supplementary file 6 [file e1f7b123c93f1f8d654687ce.xlsx]

## Sheet: Table S4
Table S4. Genetic correlations between the two brain modes and 15 psychiatric disorders and cognitive traits.
Phenotype	R value		P value		P value after FDR adjusted		URL	Reference
	brain mode 1	brian mode 2	brain mode 1	brian mode 2	brain mode 1	brian mode 2
Reaction time	-0.1573	0.0177	0.0004	0.6341	0.002	0.80725	https://doi.org/10.1038/s41467-018-04362-x	Davies, G., Lam, M., Harris, S.E. et al. Study of 300,486 individuals identifies 148 independent genetic loci influencing general cognitive function. Nat Commun 9, 2098 (2018).
Educational attainment	-0.1224	-0.0963	0.0012	0.0047	0.0045	0.017625	https://doi.org/10.1038/nature17671	Okbay, A., Beauchamp, J., Fontana, M. et al. Genome-wide association study identifies 74 loci associated with educational attainment. Nature 533, 539–542 (2016).
Cognitive performance	-0.0917	-0.0948	0.0066	0.0031	0.01875	0.0155	https://doi.org/10.1038/s41588-018-0147-3	Lee, J.J., Wedow, R., Okbay, A. et al. Gene discovery and polygenic prediction from a genome-wide association study of educational attainment in 1.1 million individuals. Nat Genet 50, 1112–1121 (2018).
Educational attainment (Cog)	-0.0902	-0.0956	0.0075	0.0022	0.01875	0.0155	https://doi.org/10.1038/s41588-020-00754-2	Demange, P.A., Malanchini, M., Mallard, T.T. et al. Investigating the genetic architecture of noncognitive skills using GWAS-by-subtraction. Nat Genet 53, 35–44 (2021).
Educational attainment(NonCog)	-0.0878	-0.0465	0.016	0.2074	0.0342857	0.345667	https://doi.org/10.1038/s41588-020-00754-2	Demange, P.A., Malanchini, M., Mallard, T.T. et al. Investigating the genetic architecture of noncognitive skills using GWAS-by-subtraction. Nat Genet 53, 35–44 (2021).
Intelligence	-0.0798	-0.1078	0.0205	0.0008	0.036	0.012	https://doi.org/10.1038/s41588-018-0152-6	Savage, J.E., Jansen, P.R., Stringer, S. et al. Genome-wide association meta-analysis in 269,867 individuals identifies new genetic and functional links to intelligence. Nat Genet 50, 912–919 (2018).
Extremely high intelligence	-0.0643	-0.0936	0.2213	0.0512	0.2213	0.128	https://doi.org/10.1038/s41380-018-0040-6	Coleman, J.R.I., Bryois, J., Gaspar, H.A. et al. Biological annotation of genetic loci associated with intelligence in a meta-analysis of 87,740 individuals. Mol Psychiatry 24, 182–197 (2019).
Alcohol dependence	0.2404	0.122	0.0718	0.2434	0.08975	0.3651	https://doi.org/10.1038/s41593-018-0275-1	Walters, R.K., Polimanti, R., Johnson, E.C. et al. Transancestral GWAS of alcohol dependence reveals common genetic underpinnings with psychiatric disorders. Nat Neurosci 21, 1656–1669 (2018).
Anxiety disorder	0.2355	0.2223	0.1186	0.136	0.136846	0.291429	https://doi.org/10.1038/mp.2015.197	Otowa, T., Hek, K., Lee, M. et al. Meta-analysis of genome-wide association studies of anxiety disorders. Mol Psychiatry 21, 1391–1399 (2016).
ADHD	0.2019	0.1115	3.3289e-05	0.0085	0.0004995	0.0255	https://doi.org/10.1038/s41588-022-01285-8	Demontis, D., Walters, G.B., Athanasiadis, G. et al. Genome-wide analyses of ADHD identify 27 risk loci, refine the genetic architecture and implicate several cognitive domains. Nat Genet 55, 198–208 (2023).
PTSD	0.1571	0.1137	0.0603	0.1673	0.0822273	0.313688	https://doi.org/10.1038/s41467-019-12576-w	Nievergelt, C.M., Maihofer, A.X., Klengel, T. et al. International meta-analysis of PTSD genome-wide association studies identifies sex- and ancestry-specific genetic risk loci. Nat Commun 10, 4558 (2019).
CUD	0.1475	0.0004	0.0267	0.9952	0.04005	0.9952	https://doi.org/10.1016/S2215-0366(20)30339-4	Johnson E C, Demontis D, Thorgeirsson T E, et al. A large-scale genome-wide association study meta-analysis of cannabis use disorder[J]. The Lancet Psychiatry, 2020, 7(12): 1032-1045.
SCZ	0.1465	-0.0181	0.0001	0.6458	0.00075	0.80725	https://doi.org/10.1038/s41586-022-04434-5	Trubetskoy, V., Pardiñas, A.F., Qi, T. et al. Mapping genomic loci implicates genes and synaptic biology in schizophrenia. Nature 604, 502–508 (2022).
ASD	0.1044	-0.0033	0.1386	0.9544	0.1485	0.9952	https://doi.org/10.1038/s41588-019-0344-8	Grove, J., Ripke, S., Als, T.D. et al. Identification of common genetic risk variants for autism spectrum disorder. Nat Genet 51, 431–444 (2019).
MDD	0.0941	0.0012	0.0216	0.9707	0.036	0.9952	https://doi.org/10.1038/s41593-018-0326-7	Howard, D.M., Adams, M.J., Clarke, TK. et al. Genome-wide meta-analysis of depression identifies 102 independent variants and highlights the importance of the prefrontal brain regions. Nat Neurosci 22, 343–352 (2019).
