# Supplementary material for: Genetic mechanisms underlying the associations between brain structure and mental health
Source: Research Square preprint supplement (doi:10.21203/rs.3.rs-7996571/v1), 2025-12-02
Supplement: Supplementary file 7 [file e30aeb51dc9473cf7ecae45e.xlsx]

## Sheet: Table S6
Table S6. The significant causal genetic links from brian modes to other traits and diseases after controlling the false discovery rate of multiple testing at 5% level.
Exposure	Outcome	MR_method	Beta	SE	P value	P value after FDR adjusted	Number of IVs	SNPs	P value of horizontal pleiotropy tests	P value of heterogeneity tests
										IVW	MR Egger
Brain mode 1	C-reactive protein	IVW radial	0.23	0.07	0.00239	0.0258181	7	rs13107325、rs375848868、rs2949997、rs9273608、rs72687593、rs17178006、rs6794941	0.14	0.58	0.9
Brain mode 1	C-reactive protein	IVW (multiplicative random effects)	0.22	0.07	0.00242	0.0258181
Brain mode 1	Alcohol consumption	IVW radial	0.78	0.26	0.00246	0.0258181	6	rs6794941、rs375848868、rs2949997、rs17178006、rs72687593、rs13107325	0.53	0.44	0.37
Brain mode 1	Alcohol consumption	IVW (multiplicative random effects)	0.78	0.26	0.00249	0.0258181
Brain mode 1	Alcohol consumption	IVW (fixed effects)	0.78	0.26	0.00308	0.028551
Brain mode 1	Alcohol consumption	Maximum likelihood	0.8	0.27	0.00335	0.0295054
Brain mode 2	ASD	IVW radial	0.6	0.04	9.26e-45	8.58792e-43	3	rs394502、rs1309548、rs4703894	0.89	0.98	0.95
Brain mode 2	ASD	IVW (multiplicative random effects)	0.6	0.04	9.54e-45	8.58792e-43
Brain mode 2	Depressive symptoms	IVW (multiplicative random effects)	0.1	0.02	6.41e-06	0.000128173	5	rs12403837、rs4703894、rs1309548、rs6658111、rs394502	0.58	0.79	0.73
Brain mode 2	Depressive symptoms	IVW (fixed effects)	0.1	0.03	0.00328	0.0295021
Brain mode 2	Childhood intelligence	IVW radial	-0.29	0.03	2.24e-17	1.00585e-15	3	rs4703894、rs394502、rs1309548	0.96	0.95	0.75
Brain mode 2	Childhood intelligence	IVW (multiplicative random effects)	-0.29	0.03	2.16e-17	1.00585e-15
